## The use of Frontier Analysis to assess the technical rigor of water loss performance indicators

Alan S. Wyatt 

1510 Village Crossing Drive, Chapel Hill, NC 27157, USA

E-mail: aswater12@gmail.com

### Abstract

The American Water Works Association (AWWA) has developed and disseminated advanced methods and performance indicators for assessing and reducing water losses in North America, based in large part on the methods and indicators developed by the International Water Association (IWA). However, many utilities and regulators still use the old, inaccurate, %NRW indicator. A robust, quantitative assessment of the technical rigor of water loss indicators was needed but could not be found in the literature. So, an innovative approach was developed, using Frontier Analysis which provided such a score of 'technical rigor'. This paper presents this method, applied to three datasets from North America, assessing 15 candidate indicators for total water losses, apparent losses and real losses. The results provide quantitative 'scores' of the technical rigor of the candidate indicators. Indicators with relatively high scores align with indicators used in the IWA best practices. Other indicators, such as the %NRW indicator, were found to have low technical rigor. The conclusion of the paper summarizes the rigorous indicators, and suggests areas for further application of this method, and for further research.

**Key words:** Frontier Analysis, performance indicators, water loss, water utilities

### Highlights

- There has been no in-depth research or analysis on the technical rigor of water loss indicators.
- A method to make such an assessment was developed by the author, based on Frontier Analysis.
- The method was applied to three datasets of validated water loss audits from North America for 15 candidate water loss indicators.
- The results clearly quantify indicators which are rigorous, and which are not.
- The commonly used %NRW indicator has low technical rigor.

## Graphical Abstract

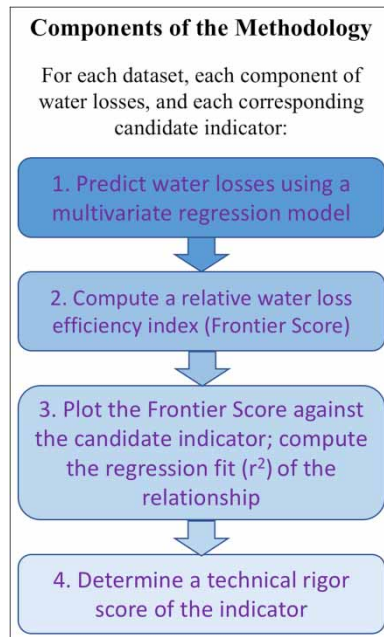

## INTRODUCTION

Water utilities in North America face significant challenges from climate change, population growth, aging infrastructure, increasing non-revenue water, and declining consumption and revenues. The reduction and control of water losses can mitigate these challenges. In order to conduct a successful water loss control program, water utilities need ‘technically rigorous’ performance indicators to assess and benchmark performance, set targets, plan programs, and monitor and refine their work.

The American Water Works Association (AWWA) has developed and disseminated advanced methods and performance indicators for managing water losses, based in large part on the methods and indicators developed by the International Water Association (IWA). These methods encourage the use of indicators based on unit volumes of real loss and apparent loss. However, many utilities and regulators still use the old, inaccurate, %NRW indicator which has been shown by many authors to be misleading (Liemberger *et al.* 2007; Lambert *et al.* 1999, 2014; AWWA 2016; Trachtman & Wyatt 2019). The use of this flawed indicators leads to inaccurate target setting, poor planning, and inferior results of water loss reduction and control programs.

A robust method was needed to demonstrate the technical rigor of each of the AWWA/IWA indicators, but there had not been any studies to justify the adoption of the more accurate indicators. Therefore, the author developed a method based on Frontier Analysis to create a water loss efficiency score and compare indicators to that score, using simple regression. Indicators which had a high regression fit would be technically rigorous and those with a low regression fit would not be. This method was conducted for 15 different indicators, across three datasets from different parts of North America. The results showed that common percentage-based indicators had low technical rigor, but the unit volume and most AWWA/IWA recommended indicators had high technical rigor.

This paper is organized as follows. The section Background to the methodology provides background material including the methods used to collect and analyse water loss data in utilities in North America, the minimal amount of previous work on the assessment of water loss indicators and the general approach used in this paper to obtain an accurate ‘technical score’ of indicators. The section entitled Datasets used and indicators assessed reviews the attributes of the datasets used. The Methodology section provides a detailed explanation of the methodology and the Results

and discussion section provides the results. Finally, the Conclusions section outlines the conclusions of the work, and an Appendix provides detailed statistical results.

## BACKGROUND TO THE METHODOLOGY

### Water loss assessment in North America

In 2010, the AWWA developed a spreadsheet-based tool known as the Free Water Audit Software (FWAS), consistent with the AWWA/IWA methods and indicators as detailed in the AWWA Manual M36 (AWWA 2009, 2016). The software prepares a (water loss) water balance and a set of indicators values. The software also provides a 'data validity score' for the audit, based on practices used to determine the input parameters. There is also a standard AWWA validation process where third party reviewers work with utilities to conduct QC efforts to improve audit accuracy (Andrews *et al.* 2016a, 2016b). Since the initial launch with a small number of 'volunteer' utilities, the software has been improved and its use greatly expanded. Currently there are many hundreds of annual FWAS audits, many of which have been required by State regulators. An analysis of basic results of the use of FWAS from 2010 to 2015 was published in 2016 (Sayers *et al.* 2016).

### Previous research on the accuracy of water loss indicators

There have been very few studies which have assessed the accuracy or suitability of different water loss indicators. There is a body of literature on the flaws of the %NRW indicator, including those cited in the Introduction. More detailed assessments were carried out in France in response to new regulations instituted in 2007, which stipulated the use of the %NRW and a Linear Leakage Index (LLI) in m<sup>3</sup>/km/day. Renaud (2009) described a linear regression analysis of the LLI and found it to be highly sensitive to connection density, and proposed a Customer Leakage Index, in m<sup>3</sup>/connection/day as a better indicator of unit real losses.

### Principal concept of the methodology used in this paper

The key premise of the methodology used in this paper is as follows. If there was an accurate method to analyze a group of water loss audits to obtain a series of quantitative water loss efficiency scores, then comparison and correlation of various candidate indicators to those water loss efficiency scores would reveal the technical rigor of those candidate indicators. A strong correlation between the efficiency score and the indicator would demonstrate a high technical rigor of the candidate indicator. If the relationship is highly scattered and has a weak correlation, the candidate indicator would have low technical rigor.

### Overview of Frontier Analysis and data envelopment analysis for utility efficiency estimation

There are two options for methods to accurately 'analyze a group of water loss audits to obtain a series of quantitative water loss efficiency scores' – Frontier Analysis (FA) and Data Envelopment Analysis (DEA). As outlined in Abbot & Cohen (2009), FA is a parametric approach that provides a single output of efficiency based on a series of input parameters. FA has the advantages of successfully analyzing data with some uncertainty, and handling economies of scale in utilities; but requires a mathematical form to be selected. FA lends itself to the data available from water loss audits, and can be conducted in a spreadsheet which aligns with the capabilities of many utilities and regulators in North America.

The alternative, DEA is a non-parametric linear programming technique, which has the advantages of not requiring any specific formulaic structure and being able to use multiple inputs and provide

multiple outputs. It is generally best used in large datasets as it is sensitive to outliers. It also requires careful selection of input and output variables. In practical terms, it requires linear programming skills and software and therefore is more complex to implement by many North American water utilities and regulators, especially for small organizations.

Frontier Analysis has been used in the water utility sector for many years to assess overall utility performance/efficiency. [Abbot & Cohen \(2009\)](#) published an overview paper outlining several dozen applications of FA and DEA in countries around the world. Specific country analyses using FA include [Filippini \*et al.\* \(2008\)](#), [Ferro & Romero \(2009\)](#), [Worthington \(2014\)](#), [Ferro \*et al.\* \(2014\)](#), [Akimov & Simshauser \(2018\)](#), [Molinos-Senante & Maziotis \(2019\)](#) and [Murwirapachena \*et al.\* \(2019\)](#). Some of these and other studies have compared the results of FA to those of DEA. Generally, these analyses examine the overall performance/efficiency of water utilities, often measured in unit cost of service, or output (customers served, water produced) based on multiple explanatory variables. It is interesting to note that nearly all these studies use NRW as an input but use the flawed %NRW volume indicator.

### Frontier Analysis for water loss performance assessment

Use of Frontier Analysis for assessment of NRW began with the WRc report for the UK regulatory agencies ([EA & OFWAT 2008](#)). The approach developed a model that best predicted annual real losses using a number of explanatory factors. By looking at actual, observed real losses compared to the predicted real losses, a ratio can be calculated to rank the performance of the individual areas.

[Pearson & Trow \(2012\)](#) conducted a Frontier Analysis to assess comparative real loss performance in 33 district metered zones (DMZs) in a large UK water utility. The effort concluded that Frontier Analysis was very useful in comparing performance in different DMZs – to prioritize zones for interventions.

[Sandraz \*et al.\* \(2014\)](#) describes a study of the determinants of annual real losses, using multivariate regressions with the number of connections, mains length, pressure, pipe diameter, pipe breaks. Comparisons of modeled and observed real loss showed unsatisfactory correlations. The number of connections was the most significant explanatory variable, and, curiously, pressure was essentially not significant at all.

[Wyatt \*et al.\* \(2015\)](#) conducted a Frontier Analysis on real loss efficiency in 31 utilities in North America, based on standard water loss audit results and additional detailed distribution pipe network data, including mains burst rates, length and average age of existing pipe materials. Initial regression model inputs included those data and length of mains, connection density, and average operating pressure, with a logarithmic model form. Initial analyses showed that parameters such as the percentage of cast iron pipe, and the product of age and % cast iron pipe were found to be statistically insignificant and were dropped from the analysis. The final regression model had a good fit ( $r^2 = 0.732$ ) and all independent variables had statistical significance above the 95% level.

---

### DATASETS USED AND INDICATORS ASSESSED

This study used three datasets of validated water loss audits from different areas of North America. These datasets were selected because they are all composed of only validated water loss audits, were readily available, and portray different cohorts in terms of climate, utility size, connection density, water consumption, pressure, and financial parameters. None of these datasets are fully representative of conditions across North America but represent the best available data at the time of this study. These datasets were assembled and subjected to further validation during the projects described in [Trachtman \*et al.\* \(2019\)](#) and [Trachtman & Wyatt \(2019\)](#). Those reports provide extensive discussion of technical parameters and performance indicators in each dataset. The principal attributes of each dataset are summarized in [Table 1](#).

**Table 1** | Attributes of datasets used to assess technical rigor of water loss indicators

| Attributes/Indicators Dataset                                | WADI Plus     | California      | Georgia       |
|--------------------------------------------------------------|---------------|-----------------|---------------|
| Time Period of Water Loss Audits                             | 2009–2016     | CY16, FY16 – 17 | CY2016        |
| Number of Utilities                                          | $n = 66$      | $n = 272$       | $n = 155$     |
| Utility Size Range, Connections                              | 1,000–600,000 | 1,900–740,000   | 1,500–260,000 |
| Median Number of Connections                                 | 32,200        | 13,600          | 5,500         |
| Median Connection Density, Connections/km                    | 38.0          | 46.5            | 27.8          |
| Median Average Operating Pressure, m                         | 50.1          | 52.1            | 52.7          |
| Median Billed Authorized Use, L/Connection/Day               | 1,160         | 1,710           | 804           |
| Median Variable Production Cost (VPC), US\$/m <sup>3</sup>   | \$0.11        | \$0.44          | \$0.11        |
| Median Customer Retail Unit Cost (CRUC), US\$/m <sup>3</sup> | \$1.28        | \$1.06          | \$1.31        |
| Median Ratio: CRUC/VPC                                       | 10            | 2.4             | 10            |
| Median <i>Total Water Loss, L/Connection/Day</i>             | 194           | 134             | 214           |
| Median <i>Total Water Loss Value, US\$/Conn/Year</i>         | \$21          | \$30            | \$21          |
| Median <i>Apparent Loss, L/Connection/Day</i>                | 30            | 31              | 21            |
| Median <i>Apparent Loss Value, US\$/Conn/Year</i>            | \$12          | \$12            | \$9           |
| Median <i>App Loss/(App Loss + Billed Authorized Use)</i>    | 2.4%          | 1.6%            | 2.6%          |
| Median <i>Real Loss, L/Connection/Day</i>                    | 155           | 98              | 183           |
| Median <i>Real Loss, L/Conn/Day/m of pressure</i>            | 3.1           | 1.9             | 3.6           |
| Median <i>Real Loss, L/km/hr</i>                             | 250           | 188             | 192           |
| Median <i>Real Loss Value, US\$/Connection/Year</i>          | \$9           | \$16            | \$10          |
| Median <i>Infrastructure Leakage Index</i>                   | 2.2           | 1.5             | 2.2           |
| Median <i>ILI * Pressure Management Index</i>                | 3.2           | 2.3             | 3.2           |
| Median <i>NRW Volume/System Input Volume</i>                 | 18.8%         | 8.2%            | 23.3%         |
| Median <i>Real Loss Volume/System Input Volume</i>           | 13.8%         | 5.8%            | 17.4%         |
| Median <i>NRW Value/Water System Operating Cost</i>          | 5.7%          | 3.6%            | 6.9%          |
| Median <i>Real Loss Value/Water System Oper. Cost</i>        | 2.0%          | 1.8%            | 2.8%          |

Table 1 also provides a list of the 15 water loss indicators assessed, in bold and italic font. The indicators were drawn from the AWWA Free Water Audit Software, Trachtman *et al.* (2019), Trachtman & Wyatt (2019), others in use in Europe and other regions, in accordance with the IWA *Best Practice Manual: Indicators for Water Supply Services* (Alegre *et al.* 2016).

Additional notes on the three datasets are provided below.

1. The **WADI Plus** dataset, which is an expansion of an earlier AWWA dataset known as WADI, contains weighted averages of multiple annual water loss audits in 66 utilities across USA and Canada. The dataset includes a broad variety of locations – from cool wet locations in the North East region to hot dry locations in the Southwestern USA. While the range of utility sizes is wide, **WADI Plus** contains a relatively higher number of larger Eastern cities, with older infrastructure – such as Halifax, NS, Philadelphia, PA, Pittsburgh PA, Region of Peel, ON, Washington, DC, and Wilmington, DE. Many sites in **WADI Plus** have 5 consecutive years of data, which is considered to result in more accurate water loss audits.
2. The 2016 **Georgia** dataset is the most recent of five annual datasets of utilities across that State, so all locations had several years of water loss audit experience. With the exception of the City of Atlanta and utilities in suburbs around Atlanta, the dataset mostly includes small water supply systems with low connection density, low water consumption, and wider use of non-metallic piping than the other datasets.

3. The 2016 **California** dataset is a larger dataset (272 audits, filtered down from 365 validated water loss audits). There is considerable variety in the dataset from the cool, wet northern part of the State to the hot, dry, southern part. In addition, the dataset includes a mix of large utilities such as Sacramento, San Diego, San Francisco and Los Angeles, as well as many smaller suburban or rural Water Districts. Importantly, the dataset includes just one year of data, which was the first year that utilities prepared validated water loss audits.

## METHODOLOGY

### Components of the methodology

The main components of the methodology are outlined in [Figure 1](#), showing the sequence of analyses that result in a ‘technical score’ for indicators for total water losses, apparent losses, and real losses. The components are explained below.

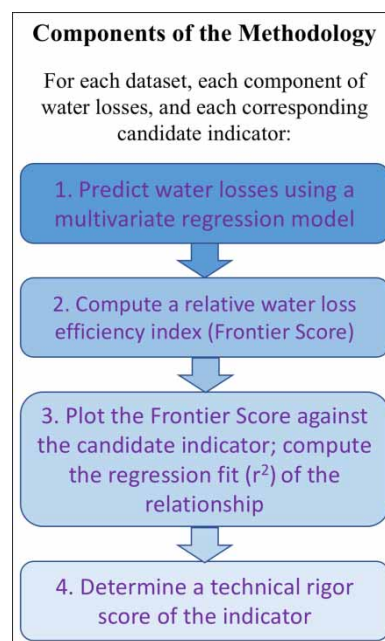

**Figure 1** | Components of the methodology.

**Component 1.** The first component is to prepare a multivariate regression model that predicts annual volume of the total water losses, of apparent losses or real losses, based solely on relevant utility attributes or other factors that are mostly out of the direct control of the utility, such as the number of connections, average operating pressure, unit variable production cost of water, etc. Variables related to water loss control practices are not included. [Table 2](#) lists the input and output variables and regression model form used – the Cobb-Douglas model. That model was used for its simplicity, which aligns well with the numerical results of water loss audits. Future studies could use a translog model form if additional parameters are introduced. Also an error term could be added to the model allowing error to be distinguished from inefficiency from other factors.

**Component 2.** The second component is to compare the annual **observed** total, apparent or real losses of each utility to the **predicted** total, apparent or real losses for that utility. The observed water loss in each utility is plotted versus the predicted water loss, as shown in [Figure 2](#). If a given utility has an observed water loss that is lower than the predicted value, then it is below the ‘average’ line and is a relatively ‘better’ performer within the dataset. On the other hand, a utility with a very



**Table 2** | Mathematical form of the regression models

| Dependent Variable    | AL = Apparent Loss, Mm <sup>3</sup> /Year                                                                                                       | RL = Real Loss, Mm <sup>3</sup> /Year                                                                                                                             | WL = Total Water Loss, Mm <sup>3</sup> /Year                                                                                                                                                                                                                                           |
|-----------------------|-------------------------------------------------------------------------------------------------------------------------------------------------|-------------------------------------------------------------------------------------------------------------------------------------------------------------------|----------------------------------------------------------------------------------------------------------------------------------------------------------------------------------------------------------------------------------------------------------------------------------------|
| Independent Variables | $N_c$ = No. of Connections<br>$BAC$ = Billed Authorized Consumption, Mm <sup>3</sup> /Year<br><br>$WP$ = Average Water Price, \$/m <sup>3</sup> | $N_c$ = No. of Connections<br>$L_m$ = Length of Mains, km<br>$P$ = Average Operating Pressure, m<br><br>$VPC$ = Variable Water Production Cost, \$/m <sup>3</sup> | $N_c$ = No. of Connections<br>$BAC$ = Billed Authorized Consumption, Mm <sup>3</sup> /Year<br>$L_m$ = Length of Mains, km<br>$P$ = Average Operating Pressure, m<br><br>$WP$ = Average Water Price, \$/m <sup>3</sup><br><br>$VPC$ = Variable Water Production Cost, \$/m <sup>3</sup> |
| Model Form            | $\ln(AL) = A + B \cdot \ln(N_c) + C \cdot \ln(BAC) + D \cdot \ln(WP)$                                                                           | $\ln(RL) = E + F \cdot \ln(N_c) + G \cdot \ln(L_m) + H \cdot \ln(P) + I \cdot \ln(VPC)$                                                                           | $\ln(WL) = J + K \cdot \ln(N_c) + L \cdot \ln(L_m) + M \cdot \ln(BAC) + N \cdot \ln(P) + O \cdot \ln(VPC) + Q \cdot \ln(WP)$                                                                                                                                                           |

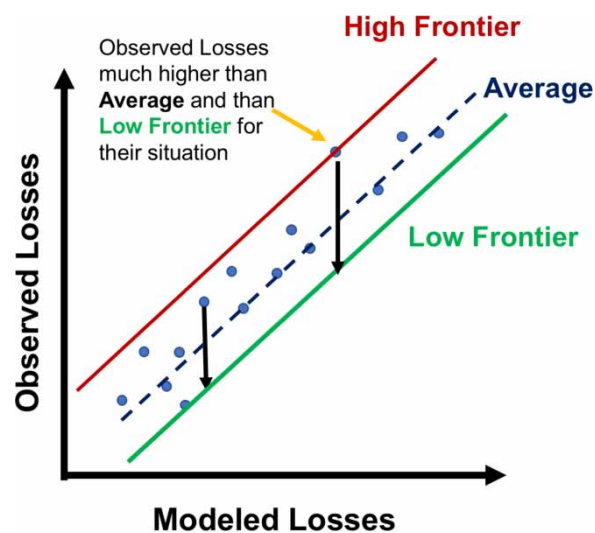**Figure 2** | Relative water loss efficiency.

high observed volume of losses relative to the predicted volume will be far above the average line and be a relatively poor performer.

It is possible to construct a (low) frontier line, which is parallel to the average line, from the observed volumes of water losses of the best performer(s). A relative water loss efficiency index for each utility can be found from the relative distance to the low frontier, which accurately reflects the relative water loss performance. In this paper, relative water loss efficiency index is also called a 'Frontier Score'.

**Component 3.** The third component is to compare the value of the efficiency index (Frontier Score) to the value of a candidate indicator for each utility, using a log-log plot. Figure 3 provides an example assessment of one real loss indicator. The plot is examined for any bias, large scatter or other graphical signal of a weak relationship. From there, the analysis continues with a simple regression of the Frontier Score against the indicator value, usually using a power function and the computation of the regression fit,  $r^2$ . If the regression fit is high and no large scatter or skew is present, then that indicator can be considered technically rigorous, in that dataset. Figure 3 shows a strong relationship between indicator value and the Frontier Score and high regression fit,  $r^2 = 0.845$ .

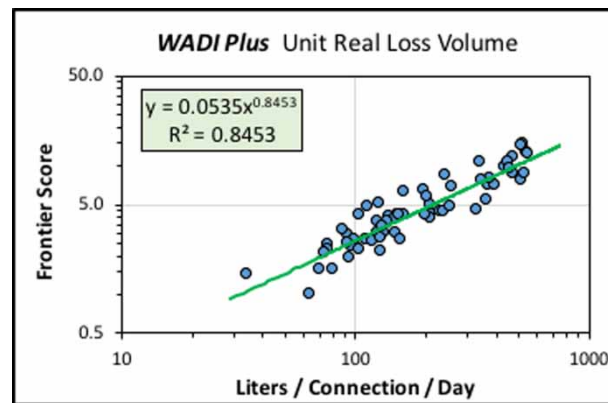

**Figure 3** | Example regression of Frontier Score and unit real loss volume indicator.

**Component 4.** The last component of the methodology is to determine an overall score for technical rigor of the indicator. The three components above will have been carried out separately for each indicator and for each dataset. Two additional criteria can be reviewed, especially when the graphical view and the regression fit ( $r^2$ ) lead to uncertainty on the technical rigor. Those additional quantitative criteria include the following:

1. The correlation coefficient between the Frontier Score and the indicator. A high correlation coefficient indicates a close relationship between the variables.
2. The standard error of the Frontier Score at the mean indicator value. A low standard error, in simple terms, indicates a low 'spread' of data points on the graph.

The use of these additional factors provides a more thorough and quantitative examination of the relationship between the Frontier Score and the indicator. Note that the standard error is influenced by the dataset sample size, so comparison of standard errors across datasets is inaccurate, but comparison between indicators for a given dataset is acceptable. An example of this process with two indicators in the California dataset is shown in [Figure 4](#). The unit volume indicator has higher correlation coefficient and a lower standard error than the unit value indicator. In addition, the regression fit is considerably higher for the case of the unit volume indicator.

In many cases, reviewing the correlation coefficient and standard error will not be needed, especially if the regression fit is very strong. Also, the correlation coefficient and standard error reflect characteristics which are mostly 'captured' in the regression fit. Therefore, [Table 3](#) was prepared as simplified scoring of Technical Rigor, based solely on the regression fit. This simplified scoring facilitates a quick 'grasp' of the rigor of an indicator and easy comparison between indicators within a dataset, and also across datasets for a given indicator.

## RESULTS AND DISCUSSION

The analysis resulted in technical rigor scores for each of the 15 water loss indicators in each of the three datasets. This section of the paper provides an example graph of the observed and predicted volumes of total annual water losses, apparent losses and real losses volumes, one for each dataset. Tables are provided here on the regression fits ( $r^2$ ) and technical rigor scores for all indicators in all datasets. The Appendix provides analysis of variance (ANOVA) tables for each FA regression, including coefficients, standard errors and statistical significance of input parameters.



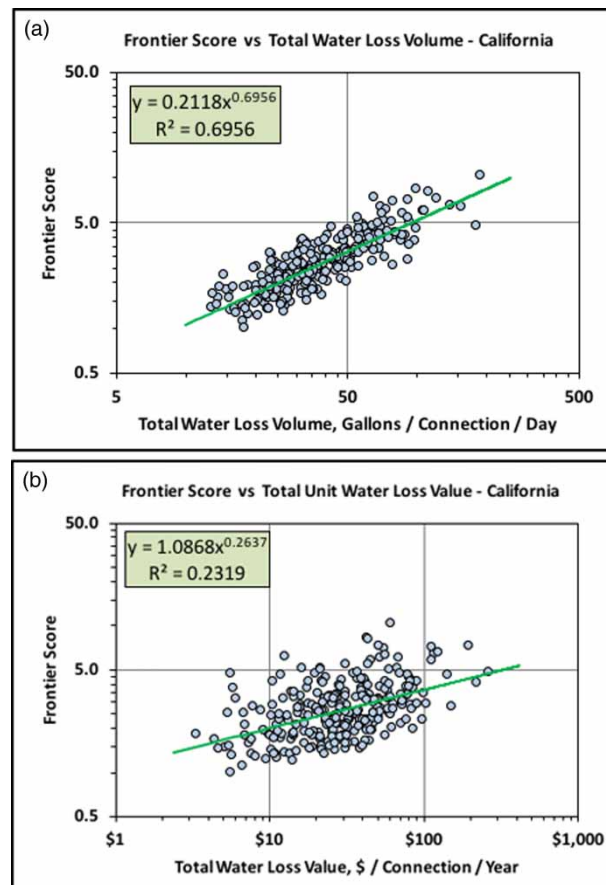

**Figure 4** | Relationship of total water loss volume and value indicators to Frontier Scores.

**Table 3** | Rating scale for technical rigor

| Range of $r^2$ | Technical Rigor |
|----------------|-----------------|
| 0.850–1.000    | 5               |
| 0.700–0.849    | 4               |
| 0.550–0.699    | 3               |
| 0.400–0.549    | 2               |
| <0.400         | 1               |

### Frontier Analysis of total water losses in California

Figure 5 provides a graph of observed and predicted total annual water losses in California. The FA has a very good regression fit ( $r^2$ ) of 0.843, a standard error of 0.431 and an F Statistic close to 240.

The spread of observations is quite even, but there is some skew for very large utilities in the State. The span from low frontier to high frontier is moderate – from about 0.38 to 3.9 times the average.

Table 4 provides a summary of results for total unit water losses across the three datasets. The volume-based indicator has a fairly high technical rigor, while the technical rigor of the value-based indicator is lower and varies considerably across datasets.

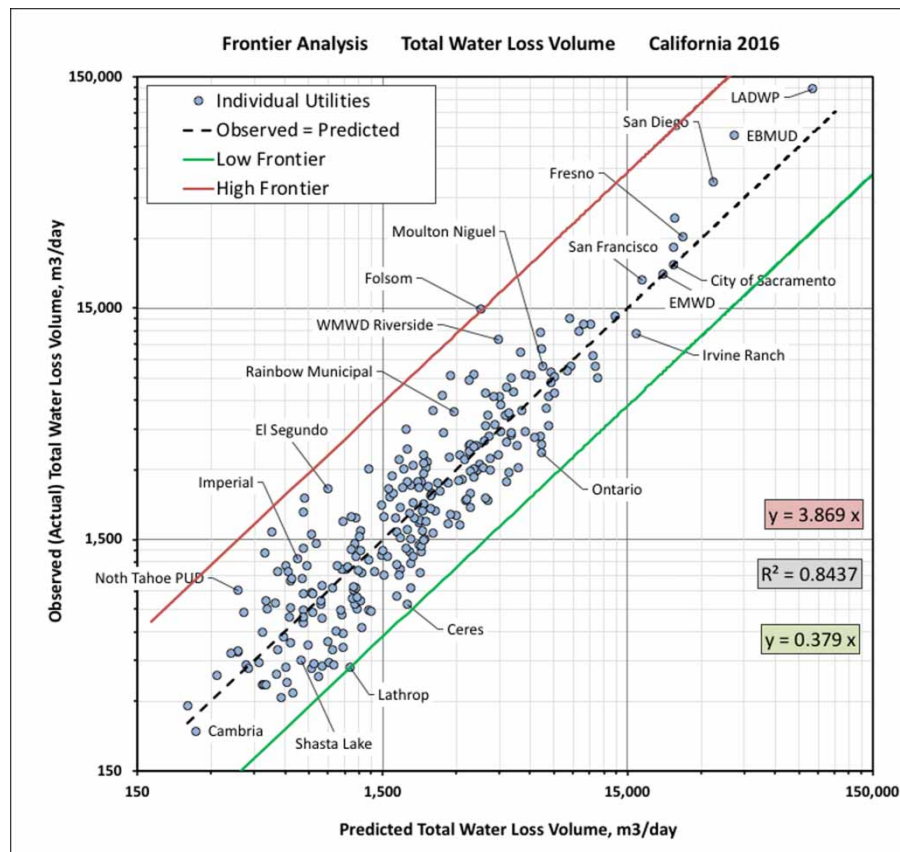

**Figure 5** | Frontier Analysis of total water losses in California, 2016.

**Table 4** | Technical rigor of total water loss indicators across datasets

| Indicator                    | Dataset                                             |                                                     |                                                     | Range: $r^2$ & TR             |
|------------------------------|-----------------------------------------------------|-----------------------------------------------------|-----------------------------------------------------|-------------------------------|
|                              | WADI Plus $n = 66$                                  | California $n = 272$                                | Georgia $n = 155$                                   |                               |
| Total Unit Water Loss Volume | Regression Fit $r^2 = 0.845$<br>Technical Rigor = 4 | Regression Fit $r^2 = 0.696$<br>Technical Rigor = 3 | Regression Fit $r^2 = 0.659$<br>Technical Rigor = 3 | $r^2 = 0.66-0.84$<br>TR = 3–4 |
| Unit Total Water Loss Value  | Regression Fit $r^2 = 0.499$<br>Technical Rigor = 2 | Regression Fit $r^2 = 0.232$<br>Technical Rigor = 1 | Regression Fit $r^2 = 0.192$<br>Technical Rigor = 1 | $r^2 = 0.19-0.50$<br>TR = 1–2 |

### Frontier Analysis of apparent losses in Georgia

Figure 6 presents the plot of observed and predicted apparent losses in Georgia – which has a good regression fit ( $r^2 = 0.733$ ), a standard error of 0.72 and an F Statistic of 138.

The spread of observations is fairly even, but the span from low frontier to high frontier is quite wide – from about 0.2 to 8.7 times the average. The relatively wide spread of Frontier Scores suggests more variability in performance, possible influence of factors not in the regression model, or more error in apparent loss estimation in Georgia. Atlanta could be thought of as an outlier, but Atlanta is well known to be facing many water loss challenges.

Table 5 presents a summary of results for apparent loss indicators for the three datasets. Both the volume-based and value-based indicators had noticeable variation across the datasets, presumably due to additional factors not included in the regression model or variability in error. However, the regression fit and technical rigor of apparent loss/(billed authorized consumption + apparent loss)

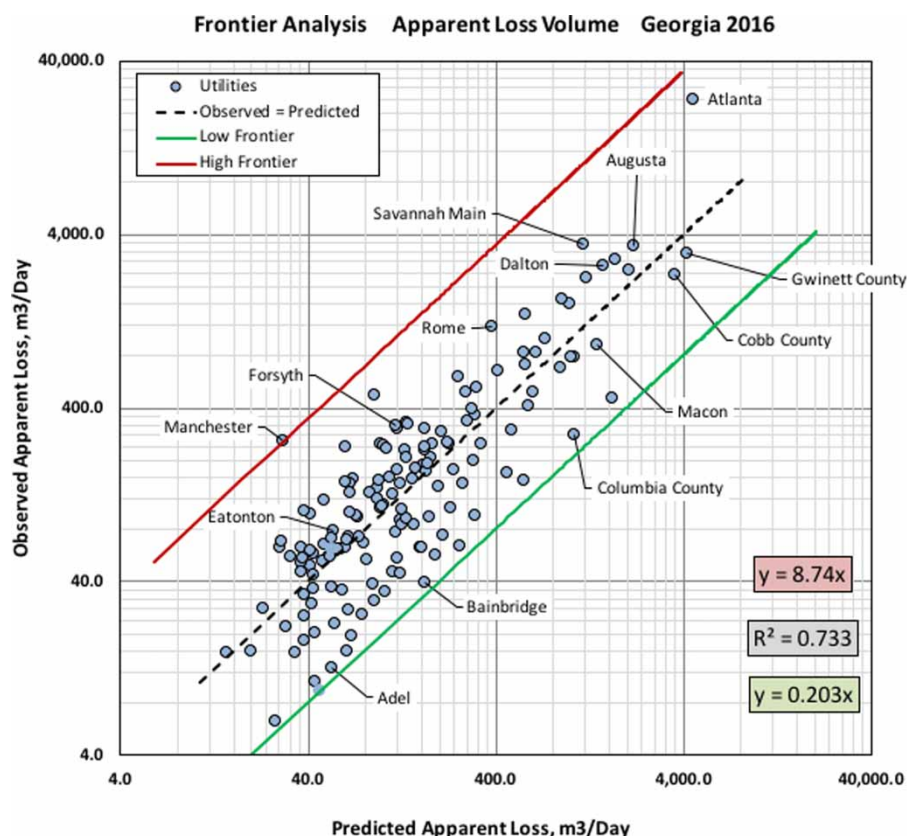

**Figure 6** | Frontier Analysis of apparent losses in Georgia, 2016.

**Table 5** | Technical rigor of apparent loss indicators across datasets

| Indicator                                             | Dataset                                             |                                                     |                                                     | Range: $r^2$ & TR             |
|-------------------------------------------------------|-----------------------------------------------------|-----------------------------------------------------|-----------------------------------------------------|-------------------------------|
|                                                       | WADI Plus $n = 66$                                  | California $n = 272$                                | Georgia $n = 155$                                   |                               |
| Volume: Liters/Connection/Day                         | Regression Fit $r^2 = 0.790$<br>Technical Rigor = 4 | Regression Fit $r^2 = 0.469$<br>Technical Rigor = 2 | Regression Fit $r^2 = 0.740$<br>Technical Rigor = 4 | $r^2 = 0.47-0.79$<br>TR = 2-4 |
| Value: \$/Connection/Year                             | Regression Fit $r^2 = 0.701$<br>Technical Rigor = 4 | Regression Fit $r^2 = 0.345$<br>Technical Rigor = 1 | Regression Fit $r^2 = 0.616$<br>Technical Rigor = 3 | $r^2 = 0.34-0.70$<br>TR = 1-4 |
| Apparent Loss/(Billed Authorized Use + Apparent Loss) | Regression Fit $r^2 = 0.922$<br>Technical Rigor = 5 | Regression Fit $r^2 = 0.948$<br>Technical Rigor = 5 | Regression Fit $r^2 = 0.982$<br>Technical Rigor = 5 | $r^2 = 0.92-0.99$<br>TR = 5-5 |

is consistently very high. In fact, this indicator has the highest rigor of all those assessed in this study. Recently, *IWA Guidance Documents on Apparent Loss* favored this indicator (Lambert *et al.* 2016).

#### Frontier Analysis of real losses using the *WADI Plus* dataset

Figure 7 presents the plot of observed and predicted real losses using the *WADI Plus* dataset – which had a very good regression fit  $r^2$  of 0.897, a standard error of 0.628 and an F Statistic of 133.

The spread of observations is fairly even, with some skew for the larger utilities in older cities. The span from the low frontier to the high frontier is relatively narrow from about 0.23 to 3.4

Table 6 presents the results for real loss indicators in each dataset. The technical rigor of many real loss volume indicators is quite high and also reasonably consistent across dataset. But there is one exception – the real loss volume per kilometer per hour which varies greatly between the datasets.

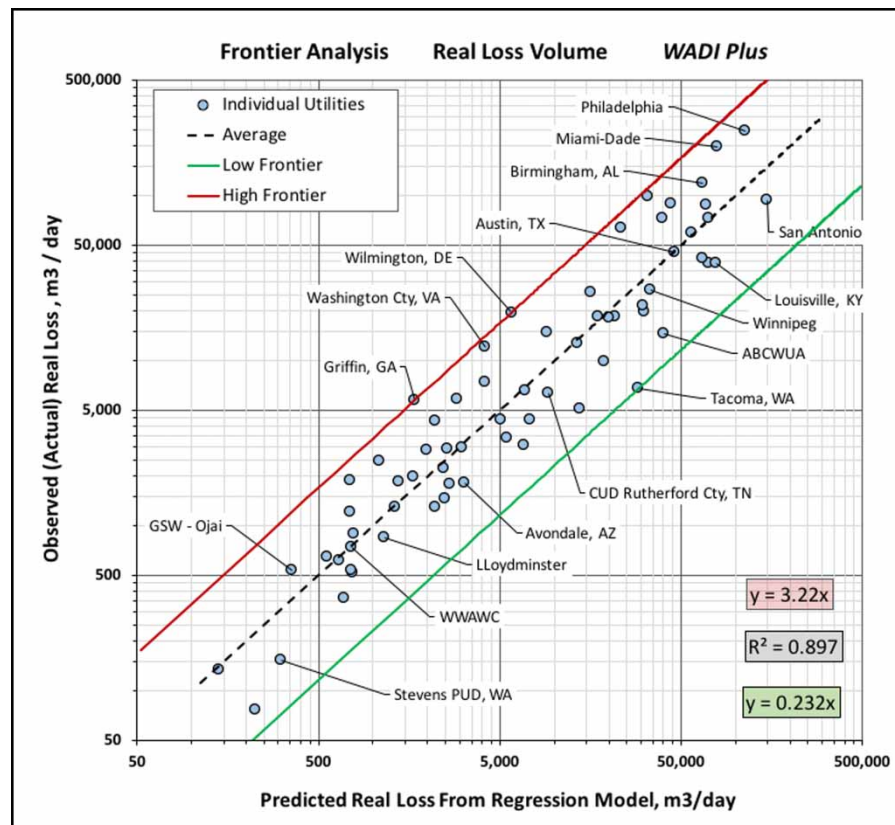

**Figure 7** | Frontier Analysis of real losses using the *WADI Plus* dataset.

**Table 6** | Technical rigor of real loss indicators across datasets

| Indicator                             | Dataset                                              |                                                     |                                                     | Range: $r^2$ & TR             |
|---------------------------------------|------------------------------------------------------|-----------------------------------------------------|-----------------------------------------------------|-------------------------------|
|                                       | WADI Plus $n = 66$                                   | California $n = 272$                                | Georgia $n = 155$                                   |                               |
| Volume: Liters/Connection/Day         | Regression Fit $r^2 = 0.845$<br>Technical Rigor = 4  | Regression Fit $r^2 = 0.654$<br>Technical Rigor = 3 | Regression Fit $r^2 = 0.766$<br>Technical Rigor = 4 | $r^2 = 0.65-0.84$<br>TR = 3-4 |
| Volume: Liters/Km/Hr                  | Regression Fit, $r^2 = 0.501$<br>Technical Rigor = 2 | Regression Fit $r^2 = 0.928$<br>Technical Rigor = 5 | Regression Fit $r^2 = 0.810$<br>Technical Rigor = 4 | $r^2 = 0.50-0.93$<br>TR = 2-5 |
| Volume: Liters/Connection/Day/m AOP   | Regression Fit $r^2 = 0.889$<br>Technical Rigor = 5  | Regression Fit $r^2 = 0.582$<br>Technical Rigor = 3 | Regression Fit $r^2 = 0.768$<br>Technical Rigor = 4 | $r^2 = 0.58-0.89$<br>TR = 3-5 |
| Infrastructure Leakage Index (ILI)    | Regression Fit $r^2 = 0.722$<br>Technical Rigor = 4  | Regression Fit $r^2 = 0.745$<br>Technical Rigor = 4 | Regression Fit $r^2 = 0.846$<br>Technical Rigor = 4 | $r^2 = 0.72-0.85$<br>TR = 4-4 |
| ILI * Pressure Management Index (PMI) | Regression Fit $r^2 = 0.702$<br>Technical Rigor = 4  | Regression Fit $r^2 = 0.862$<br>Technical Rigor = 5 | Regression Fit $r^2 = 0.875$<br>Technical Rigor = 5 | $r^2 = 0.70-0.86$<br>TR = 4-5 |
| Value: \$/Connection/Year             | Regression Fit, $r^2 = 0.492$<br>Technical Rigor = 2 | Regression Fit $r^2 = 0.161$<br>Technical Rigor = 1 | Regression Fit $r^2 = 0.378$<br>Technical Rigor = 1 | $r^2 = 0.16-0.49$<br>TR = 1-2 |

The reasons for this variation are not fully clear but anecdotal information suggests that the materials used for mains and for connections are different in the different datasets, changing the principal locations of leakage, which in turn affects the variability of the real loss indicator values.

The technical rigor of the real loss value indicator is low because of its mathematical form. It is derived from the product of the real loss unit volume indicator multiplied by the unit variable production cost (VPC) of water. However, the VPC is often out of the control of the utility, given regulations/restrictions on water sources, raw water quality for surface water systems, the pumping

head for groundwater systems, and other factors. Therefore, as a water loss volumetric performance indicator, a high value of the real loss unit value does not necessarily mean a high real loss volume. The real loss unit value can be very useful in assessing the cost benefit of different real loss interventions, but it is not an accurate indicator of utility real loss performance.

### Percentage-based indicators

Table 7 presents the regression fits and technical rigor scores for four percentage-based indicators, including the commonly used %NRW volume indicator. The regression fits are weak and the technical rigor scores are considerably lower than other indicators. This finding reinforces the concerns regarding the well-known flaws of percentage-based NRW indicators.

**Table 7** | Technical rigor of percentage-based NRW indicators across datasets

| Indicator                                   | Dataset                 |                         |                         | Range: $r^2$ & TR             |
|---------------------------------------------|-------------------------|-------------------------|-------------------------|-------------------------------|
|                                             | WADI Plus               | California              | Georgia                 |                               |
| Volume of NRW/System Input Volume           | $r^2 = 0.518$<br>TR = 2 | $r^2 = 0.341$<br>TR = 1 | $r^2 = 0.527$<br>TR = 2 | $r^2 = 0.34-0.53$<br>TR = 1-2 |
| Value of NRW/Water System Operating Cost    | $r^2 = 0.212$<br>TR = 1 | $r^2 = 0.120$<br>TR = 1 | $r^2 = 0.213$<br>TR = 1 | $r^2 = 0.12-0.21$<br>TR = 1-1 |
| Real Loss Volume/System Input Volume        | $r^2 = 0.616$<br>TR = 3 | $r^2 = 0.418$<br>TR = 2 | $r^2 = 0.521$<br>TR = 2 | $r^2 = 0.42-0.62$<br>TR = 2-3 |
| Real Loss Value/Water System Operating Cost | $r^2 = 0.314$<br>TR = 1 | $r^2 = 0.154$<br>TR = 1 | $r^2 = 0.042$<br>TR = 1 | $r^2 = 0.04-0.31$<br>TR = 1-1 |

## CONCLUSIONS

Based on the data available and analysed in this study, the following conclusions can be reached:

- The combination of Frontier Analysis and regression analysis of Frontier Scores with candidate indicators is considered to be a very suitable method of assessing the technical rigor of indicators.
- This method is, to the author's knowledge the first detailed quantitative assessment of water loss and water loss component indicators.
- The commonly-used %NRW indicator has very low technical rigor, confirming the long-held critique of this indicator – due to the influence that consumption has on this indicator. Other percentage-based indicators also have low technical rigor. Given that there are alternatives with high technical rigor, ongoing use of these percentage-based indicators is considered to be not useful and misleading. The one exception is real loss volume/system input volume which has moderate technical rigor in two of the datasets studied. This indicator could be useful in water resource planning, but more investigation is suggested.
- It is also noteworthy that of the scores of journal articles describing applications of Frontier Analysis and Data Envelopment Analysis only two were found to use the more rigorous water loss indicators – such as unit volumes of losses.
- The unit real loss volume and unit apparent loss volume, per connection per day, appear to be the key performance indicators, given their high technical rigor, simplicity, broad understandability, ease of calculation, and usefulness in planning interventions for water loss reduction and control. This conclusion is consistent with indicator recommendations by the IWA.
- The unit real loss value and unit apparent loss value indicators have low technical rigor for representing utility water loss performance but are very useful for financial evaluation of water loss



control activities and investments. These indicators could be more rigorous if data were separated into cohorts based on the type of water resource and scale.

- Several ratio-based indicators were found to have high technical rigor and considered useful, especially for utilities. Those include the Infrastructure Leakage Index (ILI), the Pressure Management Index (PMI), the product of those ratios (ILI\*PMI), and the ratio of Apparent Loss/(Billed Authorized Consumption + Apparent Loss).
- For some of the indicators, technical rigor varies considerably from one dataset to another. On the other hand, some indicators have high (or low) technical rigor in all three datasets. Such variation is to be expected, probably due to variations in data quality and technical parameters. More assessment, and the use of stochastic frontier analysis should help clarify these variations.
- Follow-up research to apply this method with other water loss audit datasets in different locations or regions of North America will help to refine results, but also determine if locational factors favor one indicator or another.
- The use of stochastic frontier analysis (with the introduction of an error term in the model formulation) would likely provide useful additional information on the Frontier Score values, including the magnitude of error, influence of other variables not included in the regression formulation, and perhaps provide information of the effectiveness of different types and extents of water loss control practices. However, a stochastic approach will require more sophisticated analysis software which may inhibit its use by regulators in North America.
- The use of these indicators and follow-up analyses will be enhanced by an emphasis on regular ongoing water loss audits, and on continual improvement of the accuracy of the data inputs, in support of improving water loss audit accuracy.
- The collection of additional utility parameters, along with the water loss audit, will be helpful for ongoing research, especially for more complex regression model forms, and for controlling for various environmental or institutional factors.

The results of the water loss performance indicator assessments are summarized in Table 8, which provides information on the range of technical rigor scores, suitable purposes/uses and principal

**Table 8** | Conclusions of the water loss performance indicator assessment

| Type   | Indicators: NRW, Water Losses, Apparent Loss and Real Loss        | Range of Technical Rigor | Suitable Purposes/Uses |              |                |          |          | Main Users** |
|--------|-------------------------------------------------------------------|--------------------------|------------------------|--------------|----------------|----------|----------|--------------|
|        |                                                                   |                          | Assessment             | Benchmarking | Target Setting | Planning | Tracking |              |
| Volume | NRW Volume/System Input Volume                                    | 1-2                      |                        |              |                |          |          |              |
|        | Unit Total Water Losses                                           | 3-4                      | ✓✓                     | ✓✓           | ✓✓             | ✓✓       | ✓✓       | U, R, C      |
|        | Unit Apparent Losses                                              | 2-4                      | ✓                      | ✓            | ✓              | ✓        | ✓        | U, R         |
|        | Apparent Losses/(Apparent Losses + Billed Authorized Consumption) | 5-5                      | ✓✓                     | ✓✓           | ✓✓             | ✓✓       | ✓✓       | U, R         |
|        | Unit Real Losses/Connection                                       | 3-4                      | ✓✓                     | ✓✓           | ✓✓             | ✓✓       | ✓✓       | U, R         |
|        | Unit Real Losses/Pipe Length                                      | 2-5                      | ✓                      | ✓            | ✓              | ✓        | ✓        | U, R         |
|        | Unit Real Losses/Connection/Pressure                              | 4-5                      | ✓✓                     |              |                | ✓✓       | ✓✓       | U            |
|        | Infrastructure Leakage Index (ILI)                                | 4-4                      | ✓✓                     |              |                | ✓✓       | ✓✓       | U            |
|        | ILI * Pressure Management Index                                   | 4-5                      | ✓✓                     | ✓✓           | ✓✓             | ✓✓       | ✓✓       | U            |
| Value  | Real Loss/System Input                                            | 2-3                      |                        |              |                |          | ✓        | U, R         |
|        | NRW/Water System Operating Cost                                   | 1-1                      |                        |              |                |          |          |              |
|        | Unit Total Water Losses                                           | 1-2                      |                        |              |                |          |          |              |
|        | Unit Apparent Losses                                              | 1-4                      | ✓                      |              |                | ✓        | ✓        | U, R         |
|        | Unit Real Losses                                                  | 1-2                      |                        |              |                |          |          |              |
|        | Real Loss/Water System Operating Cost                             | 1-1                      |                        |              |                |          |          |              |

\*\*Key for Main Users: U = Utilities, R = Regulators, C = Customers.



users of indicators. For guidance on the reliable use of indicators, a preliminary value of a threshold of technical rigor of 3 or larger was assumed. (This threshold corresponds to a regression fit between the indicator and the Frontier Score greater than 0.55). Those cells with two check marks are deemed technically rigorous, because the Technical Rigor Score is 3 or higher in all three datasets.

The absence of check marks indicates low, technical rigor. But some of the ‘cells’ in Table 8 have a single check mark in parentheses, which indicates that less than three of the datasets exceeded the threshold of a technical rigor of 3 or more. More analysis and interpretation of the results from these datasets is warranted, as well as application of this method to other datasets to gain a refined sense of the appropriate threshold.

These indicators form a ‘suite’ of tools which, when considered together, can provide an improved benchmarking and understanding of the magnitude and characteristics of the water losses at a utility or group of utilities. They also provide a strong, quantitative basis for identifying priority water loss challenges, setting targets, planning and implementing programs, monitoring results, and refining strategies and tactics to achieve appropriate reduction and control of water losses.

## ACKNOWLEDGEMENTS

The author wishes to acknowledge the AWWA for funding. More specifically, the author wishes to acknowledge the efforts of Jim Siriano, the AWWA Project Manager, Gary Trachtman, the overall technical study Team Leader, the AWWA Project Advisory Committee, including Will Jernigan, George Kunkel, Jennifer Laughlin, Chris Leauber, Bruce Macler, Brian Skeens. Also, the author wishes to acknowledge the following people who reviewed drafts of this paper: Jo Parker, Dave Pearson and Julian Thornton (of the IWA Water Loss Specialists Group, and especially Elvira Estruch Juan (of the IWA Benchmarking and Performance Assessment Specialists Group), and Luis Crouch of RTI International and Marc Jeuland of Duke University.

## SUPPLEMENTARY MATERIAL

The Supplementary Material for this paper is available at <https://dx.doi.org/10.2166/h2oj.2020.006>.

## REFERENCES

- Abbot, M. & Cohen, B. 2009 *Productivity and Efficiency in the Water Industry*, Vol. 17 (3–4). Utilities Policy, Elsevier Ltd, Amsterdam, pp. 233–244.
- Akimov, A. & Simshauser, P. 2018 *Performance Measurement in Australian Water Utilities: Current State and Future Directions*. Griffith University, Griffith Business School, Mount Gravatt, Queensland, Australia.
- Alegre, H., Baptista, J. M., Cabrera Jr, E., Cubillo, F., Duarte, P., Hirner, W., Merkel, W. & Parena, R. 2016 *IWA Manual of Best Practice: Performance Indicators for Water Supply Services*, 3rd edn. IWA, London.
- Andrews, L., Gasner, K., Sturm, R., Kunkel, G., Jernigan, W. & Cavanaugh, S. 2016a *Level 1 Water Audit Validation: Guidance Manual*. Water Research Foundation, Denver, Co, USA. Project #4639a.
- Andrews, L., Gasner, K., Sturm, R., Kunkel, G., Jernigan, W. & Cavanaugh, S. 2016b *Level 1 Water Audit Validation: Principles and Programs*. Water Research Foundation, Denver, Co, USA. Project #4639b.
- AWWA (American Water Works Association) 2009 *M36 Water Audits and Loss Control Programs*, Fourth edition. American Water Works Association, Denver, CO, USA.
- AWWA 2016 *M36 Water Audits and Loss Control Programs, Fourth Edition*. American Water Works Association, Denver, CO, USA.
- Environment Agency & OFWAT 2008 *Leakage Target Setting – A Frontier Approach – Final Report Prepared by WRc*. Swindon, UK
- Ferro, G. & Romero, C. 2009 *Estudio de Fronteras de Eficiencia – Empresas de Agua Y Alcantarillado de América Latina*. ADERASA, Buenos Aires, Argentina.

- Ferro, G., Lentini, E., Mercadier, A. C. & Romero, C. A. 2014 [Efficiency in Brazil's water and sanitation sector and its relationship with regional provision, property and the independence of operators](#). *Utilities Policy* **28**, 42–51.
- Filippini, M., Hrovatin, N. & Zoric, J. 2008 [Cost efficiency of slovenian water distribution utilities: an application of stochastic frontier methods](#). *Journal of Productivity Analysis* **29** (2), 169–182.
- Lambert, A., Brown, T. G., Takizawa, M. & Weimer, D. 1999 A review of performance indicators for real losses from water supply systems. *AQUA* **48** (6), 227–237.
- Lambert, A., Charalambous, B., Fantozzi, M., Kovac, J., Rizzo, A. & Galea St John, S. 2014 Fourteen Years Experience of using IWA Best Practice Water Balance and Water Loss Performance Indicators in Europe. In: *Proceedings of the IWA Water Loss Conference*, Vienna, Austria.
- Lambert, A., Arregui, F., Carteador, F., Johnson, E., Rizzo, A. & Vermersh, M. 2016 *Guidance Notes on Apparent Losses and Water Loss Reduction Planning*. unpublished draft by the Apparent Loss Subcommittee of the IWA Water Loss Specialists Group.
- Liemberger, R., Brothers, K., Lambert, A., McKenzie, R., Rizzo, A. & Waldron, T. 2007 Water Loss Performance Indicators. In: *Proceedings of the IWA Water Loss Conference*, Bucharest, Romania.
- Molinos-Senante, M. & Maziotis, A. 2019 [Productivity growth and its drivers in the Chilean water and sewerage industry: a comparison of alternative benchmarking techniques](#). *Urban Water Journal* **2019** (16), 353–364.
- Murwirapachena, G., Mahabir, J., Mulwa, R. & Dikgang, J. 2019 *Efficiency in South African Water Utilities: A Comparison of Estimates From DEA, SFA and StoNED; Economic Research Southern Africa (ERSA)*. Economic Research Southern Africa, Cape Town, Available from <https://www.econrsa.org/node/1569>
- Pearson, D. & Trow, S. 2012 Comparing Leakage Performance using the Frontier Approach. In: *Proceedings of the IWA Water Loss Conference*, Manila, Philippines.
- Renaud, E. 2009 *Valeurs de Références de L'indice Linéaire de Pertes des Réseaux D'alimentation en eau Potable Application Dans le Contexte du SAGE Nappes Profondes de Gironde, SMEGREG*.
- Sandraz, A., Clauzier, M., Renaud, E., Pillot, J. & Gilbert, D. 2014 Study of Water Loss Determinants in Order to Introduce Pressure and Number of Connections into Water Loss Indicators for French Drinking Water Supply Networks. In: *Proceedings of the IWA Water Loss Conference*, Vienna, Austria.
- Sayers, D., Jernigan, W., Kunkel, G. & Chastain-Howley, A. 2016 [The water audit data initiative: five years and counting](#). *Journal American Water Works Association* **108** (11), E598–E605.
- Trachtman, G. B. & Wyatt, A. S. 2019 *Assessment of Performance Indicators for Non-Revenue Water Target Setting and Progress Tracking*. AWWA, Denver, CO, USA.
- Trachtman, G. B., Cooper, J., Sriboonlue, S., Wyatt, A., Davis, S. & Kunkel, G. 2019 *Guidance on Implementing an Effective Water Loss Control Plan*. The Water Research Foundation, Denver, CO, USA. Project 4695.
- Worthington, A. 2014 [A review of frontier approaches to efficiency and productivity measurement in urban water utilities](#). *Urban Water Journal* **11** (1), 55–73. doi:10.1080/1573062X.2013.765488.
- Wyatt, A., Jones, P., Pearson, D. & Trow, S. 2015 Leakage Performance Assessment using Frontier Analysis: Application to Water Utilities in North America. In: *Proceedings of the International Water Association IWA Efficient Water Conference*, Cincinnati, OH, USA.

First received 14 January 2020; accepted in revised form 24 April 2020. Available online 2 June 2020
